# Supplementary material for: Incidence of Coffee Leaf Rust in Vietnam, Possible Original Sources and Subsequent Pathways of Migration
Source: Front Plant Sci. 2022 Apr 5;13:872877. doi: 10.3389/fpls.2022.872877 (PMC9016365; doi:10.3389/fpls.2022.872877)
Supplement: Supplementary Table S1 — Internal transcribed spacer (ITS) sequences for coffee leaf rust fungus dowloaded from Genbank NCBI. [file Table_1.xlsx]

## Sheet: Sheet1
Table S1. ITS sequences of Hemileia vastatrix dowloaded from Genbank NCBI
No.	NCBI name	Country, year of collection	State	Latitude	Longitude	Accession #	Identifiers in this paper	Host
1	Hemileia vastatrix voucher CMPH-234	Mexico, 2017	Veracruz	19.43	-96.9	KX260253.1	Mexico_1	Coffea arabica var. Caturra Rojo
2	H. vastatrix voucher CMPH-211	Mexico, 2017	Veracruz	19.17	-96.96	KX260252.1	Mexico_2	C. arabica var. Pluma Hidalgo
3	H. vastatrix voucher CMPH-192	Mexico, 2017	Chiapas	16.7	-92.83	KX260251.1	Mexico_3	C. arabica var. Borbon
4	H. vastatrix voucher CMPH-165	Mexico, 2017	Chiapas	15	-92.15	KX260250.1	Mexico_4	C. canephora var. Robusta
5	H. vastatrix voucher CMPH-142	Mexico, 2017	Chiapas	15.05	-92.07	KX260249.1	Mexico_5	C. arabica var. Caturra Rojo
6	H. vastatrix voucher CMPH-95	Mexico, 2017	Oaxaca	15.94	-96.46	KX260248.1	Mexico_6	C. arabica var. Caturra Rojo
7	H. vastatrix voucher CMPH-80	Mexico, 2017	Oaxaca	15.95	-96.45	KX260247.1	Mexico_7	C. arabica var. Paca
8	H. vastatrix voucher CMPH-14	Mexico, 2017	Puebla	20.6	-97.69	KX260246.1	Mexico_8	C. arabica ☓ C. canephora var. Oro Azteca
9	H. vastatrix isolate 37-37-9	Mexico, 2017	Puebla	20.37	-97.86	MF417748.1	Mexico_9	C. arabica ☓ C. canephora (Coffea 832/1 ☓ C. arabica) cv. Costa Rica 95
10	H. vastatrix isolate CT-9-8	Colombia, 2007	Quindío-Buenavista	4.35857	-75.7405	EF394132.1	Colombia_1	C. arabica var Caturra
11	H. vastatrix isolate CT-9-9	Colombia, 2008	Quindío-Buenavista	4.35857	-75.7405	EF394132.2	Colombia_2	C. arabica var Caturra
12	H. vastatrix isolate CT_13_v	Colombia, 2007	Quindío-Buenavista	4.35857	-75.7405	EF394130.1	Colombia_3	C. arabica var Caturra
13	H. vastatrix isolate CTInNa2	Colombia, 2007	Caldas-Chinchiná	4.98294	-75.6102	EF394129.1	Colombia_4	C. arabica var Caturra
14	H. vastatrix isolate CTSol_1	Colombia, 2007	Quindío-Buenavista	4.35857	-75.7405	EF394128.1	Colombia_5	C. arabica var Caturra
15	H. vastatrix isolate VColPa1_2	Colombia, 2007	Quindío-Buenavista	4.35857	-75.7405	EF394127.1	Colombia_6	C. arabica var Colombia
16	H. vastatrix isolate CT_18_N	Colombia, 2007	Caldas-Chinchiná	4.98294	-75.6102	EF394126.1	Colombia_7	C. arabica var Caturra
17	H. vastatrix isolate CTInNa1	Colombia, 2007	Caldas-Chinchiná	4.98294	-75.6102	EF394125.1	Colombia_8	C. arabica var Caturra
18	H. vastatrix isolate CT_12_v	Colombia, 2007	Quindío-Buenavista	4.35857	-75.7405	EF394124.1	Colombia_9	C. arabica var Caturra
19	H. vastatrix isolate CT_7_N	Colombia, 2007	Caldas-Chinchiná	4.98294	-75.6102	EF394123.1	Colombia_10	C. arabica var Caturra
20	H. vastatrix isolate raceXXII-535	NA	CIFC-Portugal	38.7015	-9.31236	EF394122.1	CIFC_1	C. arabica var Caturra
21	H. vastatrix isolate RaceII-1126	NA	CIFC-Portugal	38.7015	-9.31236	EF394120.1	CIFC_2	C. arabica var Caturra
22	H. vastatrix isolate RaceXXII-637	NA	CIFC-Portugal	38.7015	-9.31236	EF394119.1	CIFC_3	C. arabica var Caturra
23	H. vastatrix isolate Coimbra_7	Brazil, 2018	Minas Gerais-Coimbra	-20.8468	-42.8444	MF627828.1	Brazil_1	NA
24	H. vastatrix isolate Coimbra_6	Brazil, 2018	Minas Gerais-Coimbra	-20.8468	-42.8444	MF627827.1	Brazil_2	NA
25	H. vastatrix isolate Coimbra_4	Brazil, 2018	Minas Gerais-Coimbra	-20.8468	-42.8444	MF627825.1	Brazil_3	NA
26	H. vastatrix isolate Coimbra_3	Brazil, 2018	Minas Gerais-Coimbra	-20.8468	-42.8444	MF627824.1	Brazil_4	NA
27	H. vastatrix isolate Coimbra_2	Brazil, 2018	Minas Gerais-Coimbra	-20.8468	-42.8444	MF627823.1	Brazil_5	NA
28	H. vastatrix isolate Coimbra_1	Brazil, 2018	Minas Gerais-Coimbra	-20.8468	-42.8444	MF627822.1	Brazil_6	NA
29	H. vastatrix isolate Venda_Nova_do_Imigrante_7	Brazil, 2018	Espírito Santo-Venda Nova do Imigrante	-20.3329	-41.1296	MF627821.1	Brazil_7	NA
30	H. vastatrix isolate Venda_Nova_do_Imigrante_6	Brazil, 2018	Espírito Santo-Venda Nova do Imigrante	-20.3329	-41.1296	MF627820.1	Brazil_8	NA
31	H. vastatrix isolate Venda_Nova_do_Imigrante_5	Brazil, 2018	Espírito Santo-Venda Nova do Imigrante	-20.3329	-41.1296	MF627819.1	Brazil_9	NA
32	H. vastatrix isolate Venda_Nova_do_Imigrante_4	Brazil, 2018	Espírito Santo-Venda Nova do Imigrante	-20.3329	-41.1296	MF627818.1	Brazil_10	NA
33	H. vastatrix isolate Capinópolis_6	Brazil , 2018	Minas Gerais- Capinópolis	-18.6831	-49.5708	MF627814.1	Brazil_11	NA
34	H. vastatrix isolate Capinópolis_5	Brazil, 2018	Minas Gerais- Capinópolis	-18.6831	-49.5708	MF627813.1	Brazil_12	NA
35	H. vastatrix isolate Capinópolis_4	Brazil, 2018	Minas Gerais- Capinópolis	-18.6831	-49.5708	MF627812.1	Brazil_13	NA
36	H. vastatrix isolate São_Sebastião_do_Paraíso_6	Brazil, 2018	Minas Gerais-São Sebastião do Paraíso	-20.9178	-46.9997	MF627808.1	Brazil_14	NA
37	H. vastatrix isolate São_Sebastião_do_Paraíso_5	Brazil, 2018	Minas Gerais-São Sebastião do Paraíso	-20.9178	-46.9997	MF627807.1	Brazil_15	NA
38	H. vastatrix isolate São_Sebastião_do_Paraíso_4	Brazil , 2018	Minas Gerais-São Sebastião do Paraíso	-20.9178	-46.9997	MF627806.1	Brazil_16	NA
39	H. vastatrix isolate Senhora_de_Oliveira_5	Brazil, 2018	Minas Gerais-Senhora de Oliveira	-20.7939	-43.3431	MF627802.1	Brazil_17	NA
40	H. vastatrix isolate Senhora_de_Oliveira_4	Brazil, 2018	Minas Gerais-Senhora de Oliveira	-20.7939	-43.3431	MF627801.1	Brazil_18	NA
CIFC: Centro de Investigação de Ferrugens do Cafeeiro
