# Supplementary material for: Incidence of Coffee Leaf Rust in Vietnam, Possible Original Sources and Subsequent Pathways of Migration
Source: Front Plant Sci. 2022 Apr 5;13:872877. doi: 10.3389/fpls.2022.872877 (PMC9016365; doi:10.3389/fpls.2022.872877)
Supplement: Supplementary Table S2 — Coffee leaf rust samples collected in Vietnam and Thailand. [file Table_2.xlsx]

## Sheet: Sheet1
Table S2. Coffee leaf rust samples collected in Vietnam and Thailand
Area	Province	No. of samples	Sample ID	Coffee cultivar	Date of collection
			(TSH-R)
Southeast	Dong Nai	7	30018, 30022, 30024, 30028, 30031, 30034, 30036	Coffea canephora	2019-07-12
	Binh Phuoc	4	30042, 30043, 30045, 30046		2019-06-15
Central Highlands	Dak Lak	5	30050, 30051, 30052, 30055, 30059		2019-08-07
	Dak Nong	7	30063, 30067, 30069, 30071, 30073, 30080, 30085		2019-08-06
	Lam Dong	7	30088, 30098, 30101, 30104, 30107, 30109, 30118		2019-08-08
Northwest	Son La	7	30120, 30125, 30129, 30133, 30137, 30145, 30148	Coffea arabica cv. Catimor	2019-08-17
	Dien Bien	4	30155, 30160, 30167, 30172		2019-08-18
Thailand	Chiang Mai	2	59309, 59420	Coffea canephora	26 Nov 2018 and 07 Nov 2019
