# Supplementary material for: Incidence of Coffee Leaf Rust in Vietnam, Possible Original Sources and Subsequent Pathways of Migration
Source: Front Plant Sci. 2022 Apr 5;13:872877. doi: 10.3389/fpls.2022.872877 (PMC9016365; doi:10.3389/fpls.2022.872877)
Supplement: Supplementary Table S5 — Number of haplotypes, haplotype diversity, and nucleotide diversity of the Hemileia vastatrix populations. [file Table_5.xlsx]

## Sheet: Sheet1
Table S5. The number of haplotype, haplotype diversity and nucleotide diversity of Hemileia vastatrix populations
No.	Population ID.	No of haplotype	Haplotype diversity (Hd)	Nucleotide diversity (Pi)
1	ST-Dong Nai	7	1	0.01175
2	ST-Binh Phuoc	4	1	0.02651
3	CH-Daklak	5	1	0.0194
4	CH-DakNong	7	1	0.02527
5	CH-Lam Dong	7	1	0.01452
6	NW-Son La	7	1	0.00484
7	NW-Dien Bien	3	0.833	0.00288
8	TL-Chiang Mai	2	1	0.01153
9	Veracruz	1	0	0
10	Chiapas	3	1	0.00231
11	Oaxaca	2	1	0.00346
12	Puebla	2	1	0.00115
13	Quindío-Buenavista	5	0.933	0.00412
14	Caldas-Chinchiná	2	0.5	0.00175
15	MG-Coimbra	5	0.933	0.00268
16	ES-Venda Nova do Imigrante	4	1	0.0069
17	MG- Capinópolis	3	1	0.00613
18	MG-São Sebastião do Paraíso	3	1	0.0023
19	MG-Senhora de Oliveira	2	1	0.0046
20	CIFC	3	1	0.00231
Overal		52	0.952	0.00779
