# Supplementary material for: Incidence of Coffee Leaf Rust in Vietnam, Possible Original Sources and Subsequent Pathways of Migration
Source: Front Plant Sci. 2022 Apr 5;13:872877. doi: 10.3389/fpls.2022.872877 (PMC9016365; doi:10.3389/fpls.2022.872877)
Supplement: Supplementary Table S6 — Tajima’s D value for the Hemileia vastatrix populations. [file Table_6.xlsx]

## Sheet: Sheet1
Table S6. Tajima's D value of Hemileia vastatrix populations
Statistics	Vietnam							Thailand	Brazil					Colombia		Mexico
	NW-SonLa	NW-DienBien	CH-DakLak	CH-DakNong	CH-Lam Dong	SE-DongNai	SE-BinhPhuoc	Chiang Mai	MG-Coimbra	ES-Venda Nova do Imigrante	MG-Capinópolis	MG-São Sebastião do Paraíso	MG-Senhora de Oliveira	Quindío-Buenavista	Caldas-Chinchiná	Veracruz	Chiapas	Oaxaca	Puebla	CIFC_ Portugal	Mean	S.d.
Sample size	7	4	5	7	7	7	4	2	6	4	3	3	2	6	4	2	3	2	2	3	4.15	1.89945
Pi	6.90476	5.16667	22.7	27.1429	18.1429	12.6667	30.8333	14	6.33333	9	6	3.33333	5	7	4	0	6	7	5	0	9.81119	8.6015
Tajima's D	-0.07375	-0.38921	-0.2464	-0.58352	0.06951	-0.83847	-0.56337	0	0.63465	-0.84307	0	0	0	-0.27307	-0.79684	0	0	0	0	0	-0.19518	0.37308
Tajima's D p-value	0.498	0.511	0.524	0.328	0.532	0.226	0.402	1	0.732	0.087	1	1	1	0.45	0.164	1	1	1	1	1	0.6727	0.33319
NW: Northwest, CH: Central Highands, ST: Southeast, CIFC: Centro de Investigação de Ferrugens do Cafeeiro, MG: Minas Gerais, ES: Espírito Santo.
