# Supplementary material for: Incidence of Coffee Leaf Rust in Vietnam, Possible Original Sources and Subsequent Pathways of Migration
Source: Front Plant Sci. 2022 Apr 5;13:872877. doi: 10.3389/fpls.2022.872877 (PMC9016365; doi:10.3389/fpls.2022.872877)
Supplement: Supplementary Table S7 — Genetic differentiation (measured by ϕPT) of the Hemileia vastatrix populations between Vietnam and other countries. [file Table_7.xlsx]

## Sheet: Sheet1
Table S7. Genetic differentiation (measured by ΦPT) of Hemileia vastatrix between populations in Vietnam and other countries
Pairwise population Linearized PhiPT Values
NW-SonLa	NW-DienBien	CH-DakLak	CH-DakNong	CH-Lam Dong	SE-DongNai	SE-BinhPhuoc	Thailand-Chiang Mai	MG-Coimbra	ES-Venda Nova do Imigrante	MG-Capinópolis	MG-São Sebastião do Paraíso	MG-Senhora de Oliveira	Quindío-Buenavista	Caldas-Chinchiná	CIFC-Portugal	Veracruz	Chiapas	Oaxaca	Puebla
0																				NW-SonLa
-0.0532147	0																			NW-DienBien
0.0889104	0.0543246	0																		CH-DakLak
0.0830359	0.0480105	-0.0805821	0																	CH-DakNong
0.175624	0.13286	-0.0498007	-0.084055	0																CH-Lam Dong
0.0313977	-0.0366982	0.0524999	0.0582915	0.0741625	0															SE-DongNai
0.133212	0.0456455	0.0475772	0.0893357	0.154585	0.0788259	0														SE-BinhPhuoc
0.151275	0.216675	-0.133145	-0.110824	-0.00831315	0.00477719	-0.123273	0													Thailand-Chiang Mai
0.449562	0.55739	0.357516	0.280109	0.392939	0.361615	0.335996	0.647273	0												MG-Coimbra
0.31454	0.343967	0.235736	0.181233	0.299271	0.257923	0.211868	0.433815	0.121597	0											ES-Venda Nova do Imigrante
0.32578	0.384473	0.186	0.130536	0.26689	0.235134	0.141637	0.409764	0.0902914	-0.0624226	0										MG-Capinópolis
0.51187	0.636789	0.301171	0.23678	0.372994	0.379219	0.221486	0.601639	0.441168	0.3711	0.369259	0									MG-São Sebastião do Paraíso
0.271572	0.318918	0.0987144	0.0358578	0.201751	0.1677	0.00804229	0.338729	0.407063	-0.0887944	0.0389213	0.582218	0								MG-Senhora de Oliveira
0.236604	0.215244	0.203218	0.190657	0.24387	0.146592	0.167097	0.314812	0.229417	0.223347	0.208972	0.307399	0.253361	0							Quindío-Buenavista
0.42236	0.443837	0.313016	0.262895	0.371965	0.345426	0.261692	0.494798	0.593499	0.429307	0.488245	0.613103	0.481766	0.351858	0						Caldas-Chinchiná
0.23869	0.22366	0.0894014	0.0830179	0.183955	0.0777113	-0.00513204	0.310137	0.613294	0.446676	0.41105	0.663045	0.51841	0.203999	0.515417	0					CIFC-Portugal
0.129766	0.0562493	-0.0401572	-0.0404633	0.088162	-0.0554422	-0.185293	0.230912	0.730442	0.4618	0.510969	0.820334	0.623769	0.255731	0.521075	0.0780406	0				Veracruz
0.171112	0.121208	0.0664271	0.0567892	0.15373	0.0690571	0.0311539	0.286036	0.569959	0.29521	0.337429	0.663045	0.335403	0.193803	0.507753	0.271137	0.253632	0			Chiapas
-0.0229512	0.0554034	-0.132535	-0.131344	-0.0135927	-0.0731077	-0.136847	-0.0529915	0.56694	0.247601	0.288301	0.637845	0.258333	0.157173	0.454873	0.310685	0.37061	-0.256912	0		Oaxaca
0.0182327	-0.189247	-0.0813525	-0.0788509	0.0384144	-0.13258	-0.206282	0.173669	0.686996	0.390698	0.453405	0.788872	0.508197	0.181592	0.464746	0.101638	0	0.101638	0.204396	0	Puebla
NW: Northwest, CH: Central Highands, ST: Southeast, CIFC: Centro de Investigação de Ferrugens do Cafeeiro, MG: Minas Gerais, ES: Espírito Santo.
